# Supplementary material for: A highly conductive self-assembled multilayer graphene nanosheet film for electronic tattoos in the applications of human electrophysiology and strain sensing
Source: Royal Society of Chemistry journal article supplement (doi:10.1039/d0nr08032b), 2021-01-01
Supplement: d0nr08032b1.pdf [file d0nr08032b1.pdf]

## Supporting Information

### **Highly conductive self-assembled multilayer graphene nanosheet film for electronic tattoos in applications of human electrophysiology and strain sensing**

Quan-Liang Zhao,<sup>†1\*</sup> Zhen-Ming Wang,<sup>†1</sup> Jing-Hao Chen<sup>1</sup>, Shi-Qi Liu<sup>1</sup>, Yi-Kai Wang<sup>1</sup>, Meng-Ying Zhang<sup>1</sup>, Jie-Jian Di<sup>1</sup>, Guang-Ping He<sup>1\*</sup>, Lei Zhao<sup>1</sup>, Ting-Ting Su<sup>1</sup>, Jie Zhang<sup>1</sup>, Xu Liang<sup>1</sup>, Wei-Li Song<sup>2\*</sup> and Zhi-Ling Hou<sup>3\*</sup>

<sup>1</sup>School of Mechanical and Materials Engineering, North China University of Technology, Beijing 100144, China

<sup>2</sup>Institute of Advanced Structure Technology, Beijing Institute of Technology, Beijing 100081, P. R. China

<sup>3</sup>School of Science, Beijing University of Chemical Technology, Beijing 100029, China

\* Authors to whom correspondence should be addressed. E-mail: zql-01@163.com, hegp55@126.com, weilis@bit.edu.cn, houzl@mail.buct.edu.cn

Quan-Liang Zhao and Zhen-Ming Wang contributed equally to this work.

1. Preparation of the graphene nanosheets (GNs)

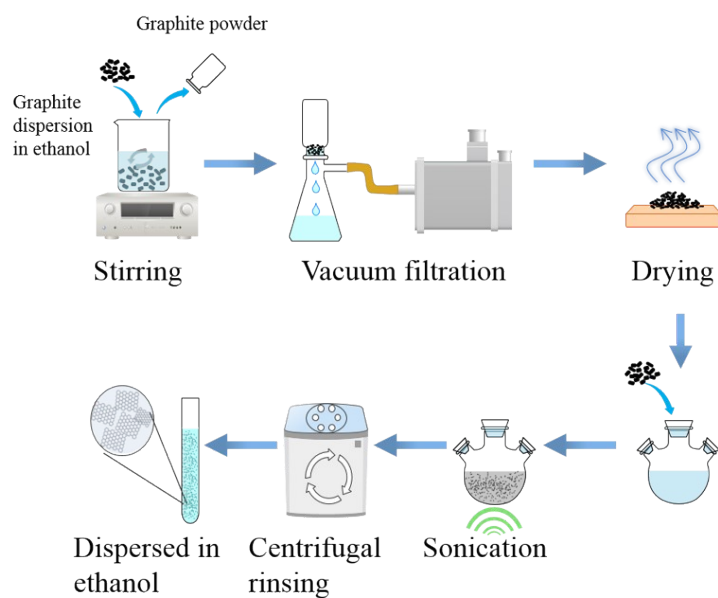

Fig. S1 Preparation of the graphene nanosheets.

## 2. Self-assembly process for the multilayer graphene nanosheet film (MGNF)

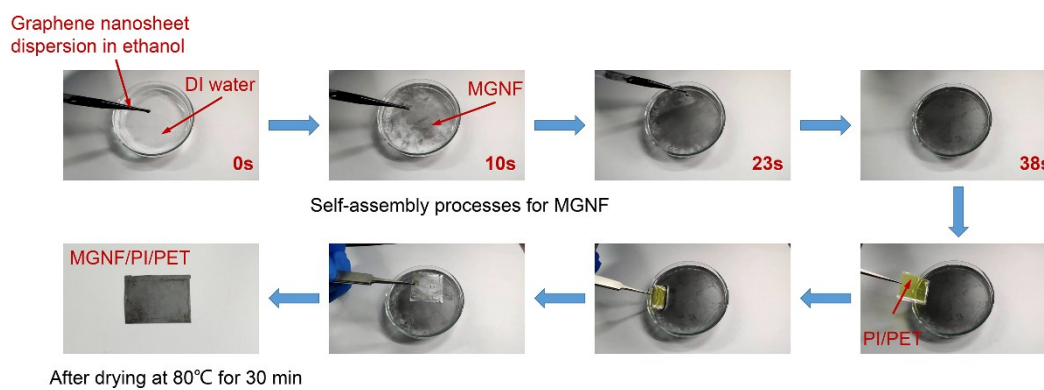

Fig. S2 Self-assembly process for the multilayer graphene nanosheet film.

### 3. Power spectral density (PSD) of ECG signals

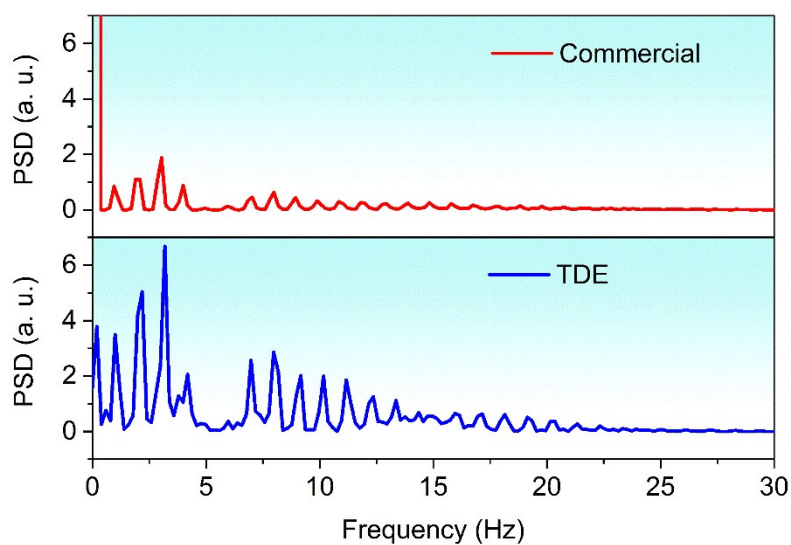

Fig. S3 PSD of ECG signals measured by TDE and commercial Ag/AgCl gel electrodes. The TDEs have the enhanced PSD intensity in 0-20 Hz frequency range, which is wider than about 0-10 Hz of Ag/AgCl gel electrodes. In addition, there is not any frequency fluctuations below 2 Hz for the TDEs and it is helpful for detecting ECG more accurately.
